# Supplementary material
Source: PubMed Central journal article supplement (PMC6365187)
Supplement: NIHMS1516480-supplement-1.pdf [file NIHMS1516480-supplement-1.pdf]

## Supplementary figure 1

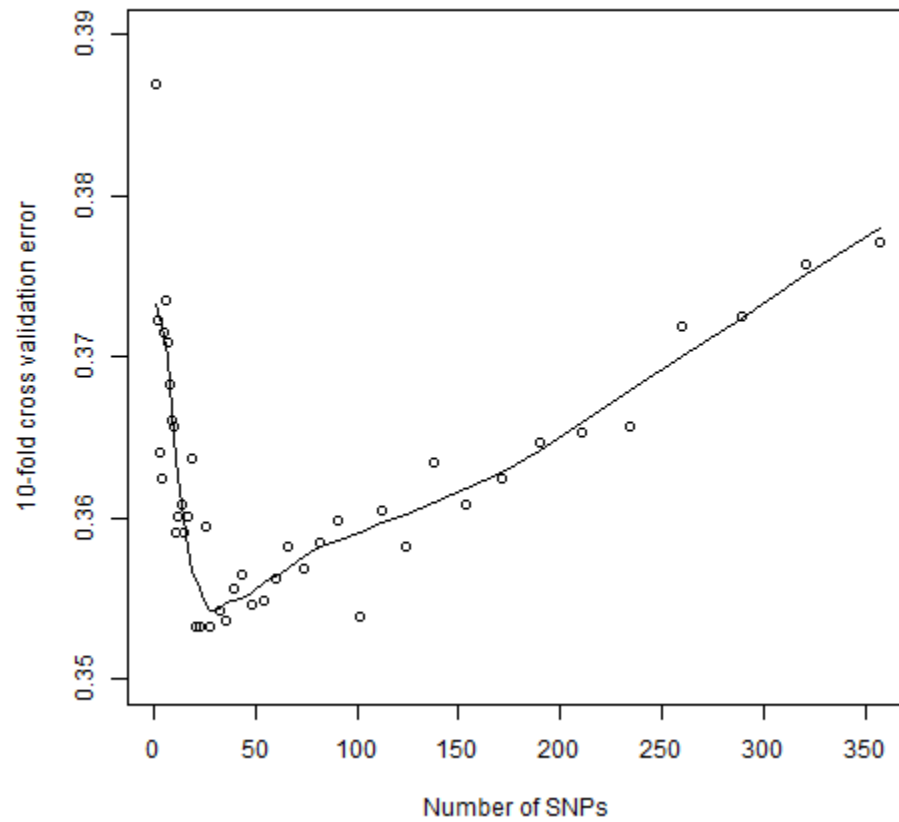

Supplementary figure 1: The ten-fold cross-validation prediction error when the number of SNPs increases in the random forests. The minimal prediction error occurred when there were 28 SNPs retained in the random forest prediction models.
